# Supplementary material for: Increased expression of protein kinase CK2α correlates with poor patient prognosis in epithelial ovarian cancer
Source: PLoS One. 2017 Mar 29;12(3):e0174037. doi: 10.1371/journal.pone.0174037 (PMC5371331; doi:10.1371/journal.pone.0174037)
Supplement: S5 Table — (XLS) [file pone.0174037.s005.xls]

## Sheet: Sheet1
ovcar3	1#	3#	nc	skov3	1#	3#	nc
	4.9	6.2	1.4		4.9	5.6	1.1
	5.1	6.5	1.5		5.2	6.4	0.9
	5.3	5.9	2.1		4.8	5.5	1.5
